# Supplementary material for: Aryl hydrocarbon receptor nuclear translocator (ARNT) isoforms control lymphoid cancer cell proliferation through differentially regulating tumor suppressor p53 activity
Source: PubMed Central journal article supplement (PMC4905433; doi:10.18632/oncotarget.7539), 2016-02-20
Supplement: oncotarget-07-10710-s001.pdf [file oncotarget-07-10710-s001.pdf]

# Aryl hydrocarbon receptor nuclear translocator (ARNT) isoforms control lymphoid cancer cell proliferation through differentially regulating tumor suppressor p53 activity

Supplementary Material

**A**

| SAMPLE    | LOCUS | COPY NUMBER |
|-----------|-------|-------------|
| ANBL6     | ARNT  | 2.180088282 |
| ARP1      | ARNT  | 4.577002048 |
| CAG       | ARNT  | 5.570586205 |
| DELTA47   | ARNT  | 5.709896564 |
| EJM       | ARNT  | 2.310377598 |
| FLAM76    | ARNT  | 2.126859426 |
| FR4       | ARNT  | 4.735713959 |
| H1112     | ARNT  | 2.823943138 |
| INA6      | ARNT  | 2.428283453 |
| JIM3      | ARNT  | 8.066644669 |
| JUN3      | ARNT  | 3.354818106 |
| JK6L      | ARNT  | 4.207172871 |
| KARPAS620 | ARNT  | 2.560871601 |
| KHM11     | ARNT  | 5.286267757 |
| KHM1B     | ARNT  | 7.544189453 |
| KMM1      | ARNT  | 2.841897726 |
| KMS11     | ARNT  | 3.987119675 |
| KMS12BM   | ARNT  | 2.827967167 |
| KMS12PE   | ARNT  | 3.253892899 |
| KMS18     | ARNT  | 3.421411276 |
| KMS20     | ARNT  | 6.815284252 |
| KMS26     | ARNT  | 2.981743097 |
| KMS28BM   | ARNT  | 3.274240494 |
| KMS28PE   | ARNT  | 3.511126518 |
| KMS34     | ARNT  | 2.48257041  |
| L363      | ARNT  | 2.905746937 |
| LP1       | ARNT  | 4.724547863 |
| MM1R      | ARNT  | 3.193591356 |
| MM1S      | ARNT  | 3.315104723 |
| MM_M1     | ARNT  | 4.242246628 |
| NCIH929   | ARNT  | 4.868062496 |
| OCIMY1    | ARNT  | 2.045366049 |
| OCIMY5    | ARNT  | 1.985526204 |
| OCIMY7    | ARNT  | 3.692774534 |
| OPM1      | ARNT  | 3.624837637 |
| OPM2      | ARNT  | 5.21121788  |
| PE1       | ARNT  | 2.668722868 |
| PE2       | ARNT  | 2.939680099 |
| RPMI8226  | ARNT  | 3.811626434 |
| SACHI     | ARNT  | 2.053567886 |
| SKMM1     | ARNT  | 4.144442558 |
| SKMM2     | ARNT  | 2.115360737 |
| U266      | ARNT  | 3.01539278  |
| UTMC2     | ARNT  | 3.401702642 |
| XG1       | ARNT  | 2.899944782 |
| XG2       | ARNT  | 2.990574598 |
| XG6       | ARNT  | 3.940377474 |
| XG7       | ARNT  | 5.152966022 |

**B**

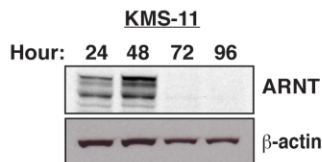

**C**

## ARNT Copy Number in TCGA Lymphoma Diffuse Large B-Cell Lymphoma vs. Normal

Copy Number P-value: 0.019  
Gain Gene Rank: 290 (in top 2%) t-Test: 2.203  
Reporter: 01-149082309 Fold Change: 1.075

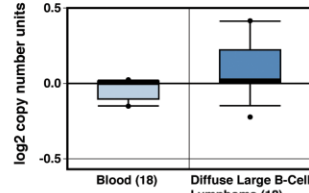

## ARNT Copy Number in TCGA Breast 2 Invasive Ductal Breast Carcinoma vs. Normal

Copy Number P-value: 1.34E-124  
Gain Gene Rank: 574 (in top 4%) t-Test: 29.904  
Reporter: 01-149082309 Fold Change: 1.288

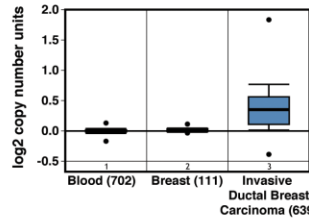

## ARNT Copy Number in TCGA Uterus 2 Endometrial Endometrioid Adenocarcinoma vs. Normal

Copy Number P-value: 2.80E-37  
Gain Gene Rank: 81 (in top 1%) t-Test: 14.269  
Reporter: 01-149082309 Fold Change: 1.174

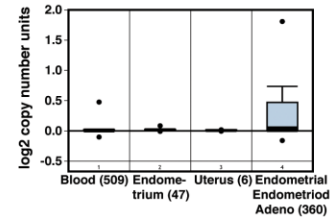

## ARNT Copy Number in TCGA Lung 2 Lung Adenocarcinoma vs. Normal

Copy Number P-value: 1.26E-52  
Gain Gene Rank: 611 (in top 4%) t-Test: 18.336  
Reporter: 01-149082309 Fold Change: 1.207

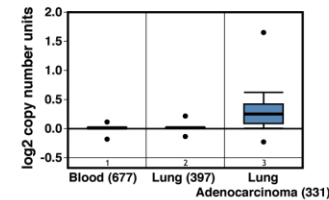

Supplemental Figure 1: Shown in this figure is expanded ARNT copy number analysis of human myeloma cell lines and OncoPrint analysis of ARNT copy number in various cancer types.

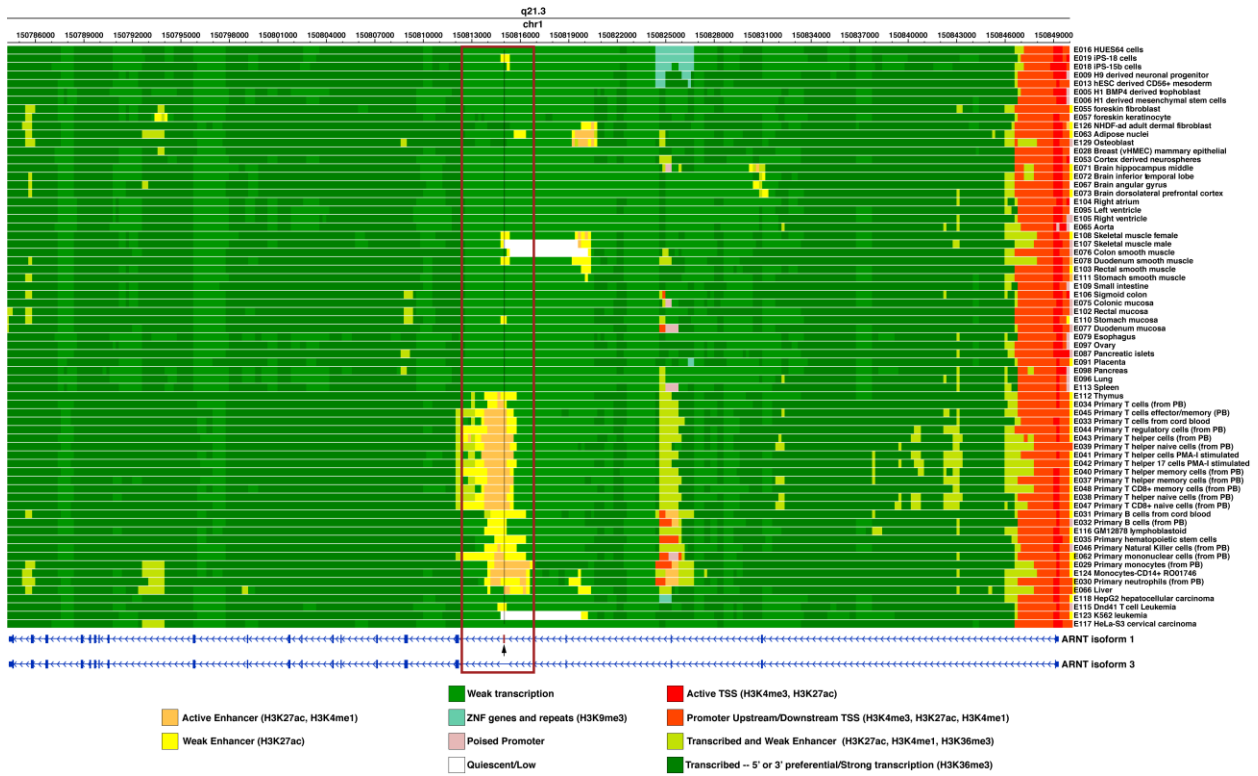

Supplemental Figure 2: Epigenomic profiles of the ARNT locus obtained from data sets from the NIH Roadmap Epigenomics Consortium, indicating a unique difference between histone modifications between primary lymphoid cells and cancer cells.
